# Supplementary material
Source: Springer Nature journal article supplement (https://www.springermedizin.de/resource/supplementary/13054_2010_8685_MOESM5_ESM.pdf/9732786)

● Placebo

■ Caffeine

▲ AMPD1

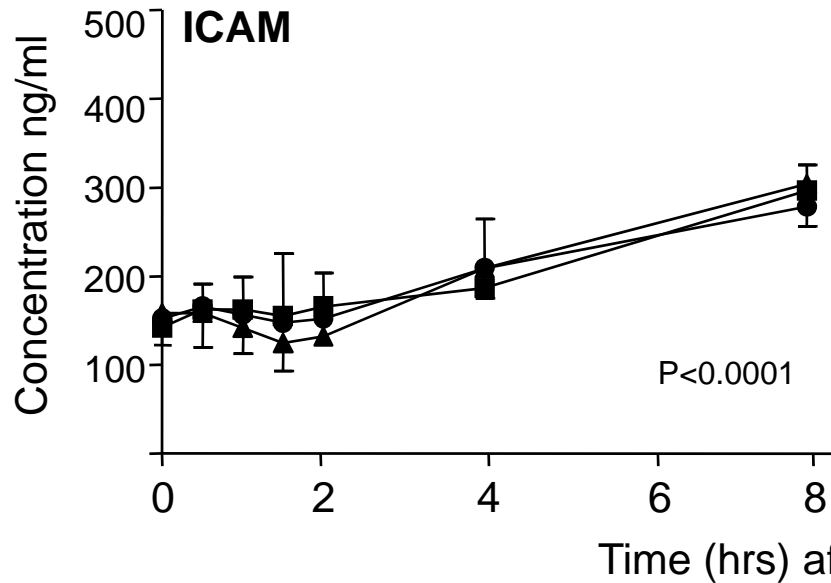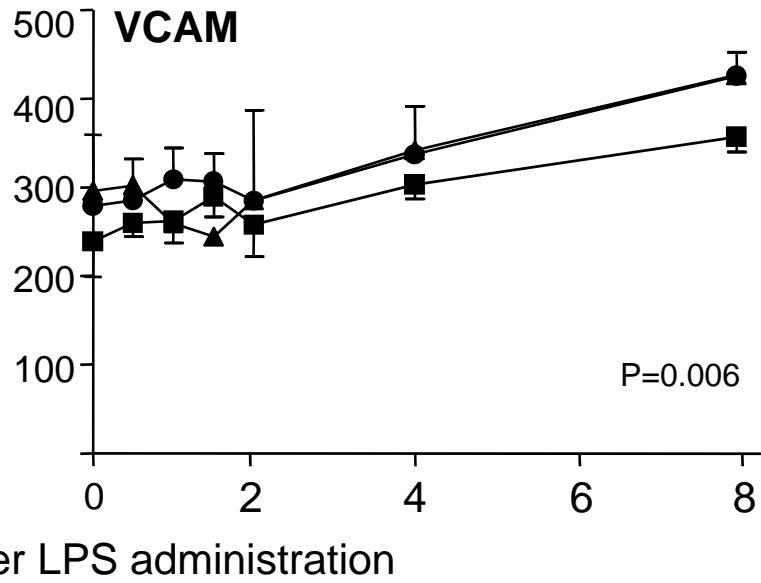

Supplement: MOESM5 [file 9732786]
